# Background free tracking of single RNA in living cells using catalytically inactive *CasE*

Feng Gao, Yue Sun, Feng Jiang, Xiaoyue Bai, and Chunyu Han\*

Gene Editing Research Center, Hebei University of Science and Technology, Shijiazhuang, Hebei 050018, China.

\*Corresponding author: hanchunyu@hebust.edu.cn

## Abstract

**RNAs have important and diverse functions. Visualizing an isolated RNA in living cells provide us essential information of its roles. By now, there are two kinds of live RNA imaging systems invented, one is the MS2 system and the other is the *Cas13a* system. In this study, we show that when fused with split-Fp, *CasE* can be engineered into a live RNA tracking tool.**

## Introduction

*CasE* is a core component of type I -E CRISPR complex, which solely processes pre-crRNA by binding specific stem-loop region, which we called C*asE* Binding Site (CBS). Even with restriction digest, it still tightly binds to the 3'-terminus of mature crRNA<sup>1</sup>(Figure 1A). The conserved His<sup>20</sup> of *CasE* is involved in the catalysis activity<sup>2</sup>; The identical mutation,  $\Delta$ His26-*TtCse3*, lost the catalytic activity but still tightly binds to its target<sup>3</sup>. In this study, by conjugating the split Venus to the N- and C-terminus of d*CasE* ( $\Delta$ His20), a live RNA tracking tool, VN-d*CasE*-VC, was constructed. This system emits fluorescence only when the target RNAs are present, thus enhancing the signal to noise performance.

## Results

Visualizing RNA in living cells requires the tracking tool without preference for specific sub-cellular distribution. The high-level expression and even distribution of *CasE*-GFP and d*CasE*-GFP in HEK293T cells indicated that *CasE* and d*CasE* are suitable for RNA manipulation in living cells (Figure 1B).

To test whether *CasE* has robust activity when expressed in mammalian cells, a “turn-off” reporter, plasmid CBS-GFP-N1, was constructed. It consisted of a GFP mRNA and a *CasE* Binding Site (CBS) in its 5'-UTR. When *CasE* was introduced into the system, the GFP expression level was sharply reduced (Figures 1C and 1D). To further test the *CasE* activity, a “turn-on” reporter, plasmid RED-16×CBS-Lin28-C1, was also constructed, in which the CBS was inserted in the 3'-UTR region of RED monomer gene and upstream of Lin28. Lin28 is an RNA nuclear retain signal, the RED monomer mRNA with a lin28 signal in its 3'-UTR can hardly be translated into protein<sup>4</sup>. The CBS-*CasE* dependent restriction cuts off the lin28 signal and release the target mRNA from nuclear for translation (Figure 1E and Figure 1F). These indicated that *CasE* can bind and cleave the CBS in mammalian cells.

Aiming at engineering the d*CasE*-CBS interaction into a RNA tracking system, we tried many schemes by conjugating the split-FP<sup>5-7</sup> to the d*CasE* protein. We found that one version, the VN-d*CasE*-VC can hardly emit fluorescent which may due to unproperly folding, or un-stable state<sup>3</sup>, but when the target RNA (CBS) was bound, the Venus signal can be clearly captured under fluorescent microscopy even when the transfection dosage of VN-d*CasE*-VC expression plasmid is very low (Figure 2A and Figure 2B).

The VN-d*CasE*-VC system was then used to track the overexpressed  $\beta$ -actin mRNA in mammalian cells, with the MS2 system<sup>8-11</sup> as a control. As shown in Figure 2C, both systems indicated the same localization of  $\beta$ -actin mRNA. However, the MS2 system showed vague image. It might be ascribed to excessive MS2 Coat Protein (MCP) without target mRNA binding. In contrast, the VN-d*CasE*-VC system showed strong fluorescence in the cytoplasm (Figure 2C).

We also observed that, adding more CBS to the target mRNA improves signal, although 2×CBS per molecule is enough for imaging the overexpressed  $\beta$ -actin mRNA (Figure 2D). Thus low abundant mRNA can be detected by increasing the number of CBS to compensate the low concentration.

Applying the VN-d*CasE*-VC system in imaging RNAs displays some interesting

results: 2×CBS RNA transcribed from H1 promoter mainly distributed in nuclear, while 16×CBS RNA from CMV promoter mainly located in cytoplasm(Figure 2E). This preliminary result may reveal that the length of RNA or type of promoter might affect the subcellular localization of RNA.

## Discussion

We invented an new RNA tracking tool , which named VN-dCasE-VC. This system is able to tracking specific RNA without background in living cells. Small Molecular Weight of dCasE make it fit for live RNA tracking: dCasE is only a little bit bigger than MCP but much smaller than *Cas13a* (13 kDa of MCP; 22 kDa of dCasE; more than 130 kDa of *Cas13a*). More than that, VN-dCasE-VC system needs much less target regions than that of MS2 system: 2×CBS is enough for VN-dCasE-VC to obtain high resolution image (Figure 2C) while at least 24×MCP Binding Site (MBS) is needed for MS2 system<sup>9, 11</sup>. To further improve the performance of VN-dCasE-VC system, optimization of the fluorescent protein segmentation or screening of more Cas orthologues will be applied.

## References:

- 1, Wiedenheft, B.et al.Structures of the RNA-guided surveillance complex from a bacterial immune system.Nature. 2011 Sep 21;477(7365):486-489.
- 2, Brouns, S. J. et al. Small CRISPR RNAs guide antiviral defense in prokaryotes.Science 321, 960–964 (2008).
- 3 , Sashital DG1, Jinek M, Doudna JA. An RNA-induced conformational change required for CRISPR RNA cleavage by the endoribonuclease Cse3. Nat Struct Mol Biol. 2011 Jun;18(6):680-7.
- 4, Chen LL1, DeCervo JN, Carmichael GG. EMBO J. Alu element-mediated gene silencing.2008 Jun 18;27(12):1694-705.
- 5 , Ohashi K et al. Visualization of cofilin-actin and Ras-Raf interactions by bimolecular fluorescence complementation assays using a new pair of split Venus fragments. Biotechniques. (2012)

- 6 , Hu CD, Chinenov Y, Kerppola TK. Visualization of interactions among bZIP and Rel family proteins in living cells using bimolecular fluorescence complementation. *Mol Cell*. 2002 Apr;9(4):789-98.
- 7 , Hu CD , Kodama Y1, An improved bimolecular fluorescence complementation assay with a high signal-to-noise ratio. *Biotechniques*. 2010 Nov;49(5):793-805.
- 8, Bertrand E1, Chartrand P, Schaefer M, Shenoy SM, Singer RH, Long RM. Localization of ASH1 mRNA particles in living yeast. *Mol Cell*. 1998 Oct;2(4):437-45.
- 9 , Wu B, Chao JA, Singer RH. Fluorescence fluctuation spectroscopy enables quantitative imaging of single mRNAs in living cells. *Biophys J*. 2012 Jun 20;102(12):2936-44.
- 10 , Wu B, Chen J, Singer RH. Background free imaging of single mRNAs in live cells using split fluorescent proteins. *Sci Rep*. 2014 Jan 9;4:3615.
- 11 , Tutucci E, Vera M, Biswas J, Garcia J, Parker R, Singer RH. An improved MS2 system for accurate reporting of the mRNA life cycle. *Nat Methods*. 2018 Jan;15(1):81-89.

5

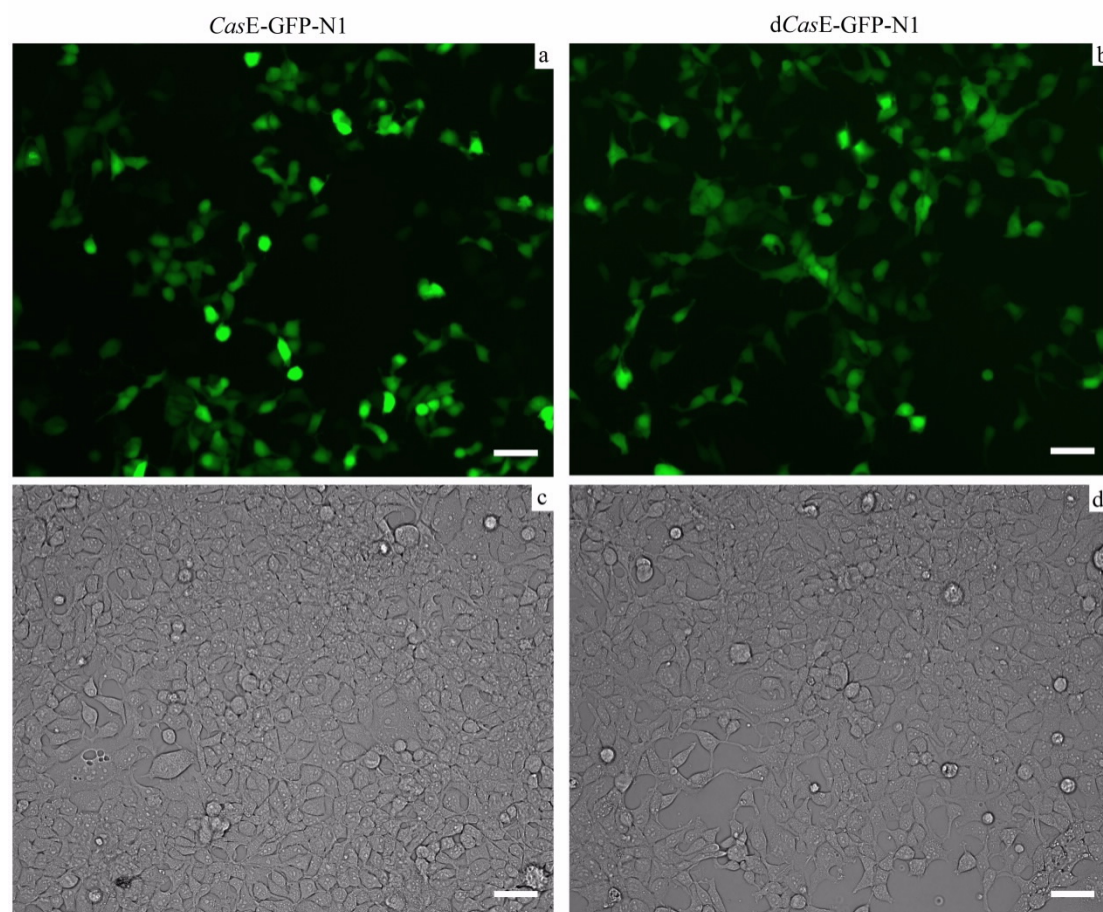

**Figure 1B.** Overexpression of *CasE*-GFP and *dCasE*-GFP by transient transfection of 293T cells cultivated in a 24-well plate (2 cm<sup>2</sup>). The transfection dosage is 300 ng plasmid per well. c and d are the bright field images of a and b. Scale bar indicates 50  $\mu$ m.

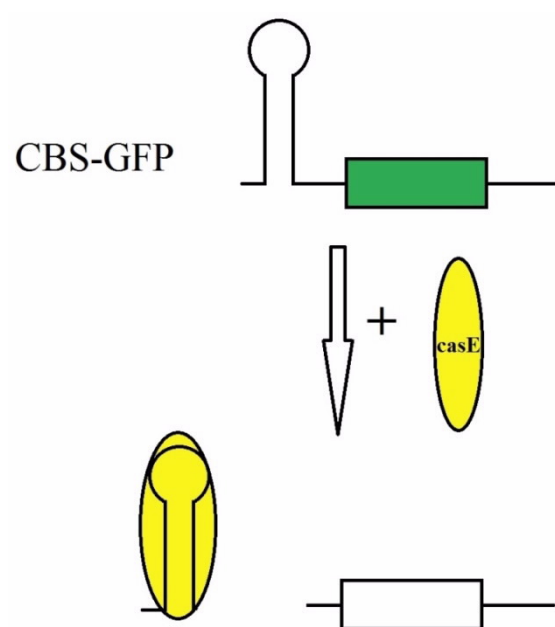

**Figure 1C.** Graphical illustration of the ‘turn-off’ reporter system. *CasE* binds the CBS region and cleaves the CBS-GFP mRNA. GFP translation was then blocked by decapitation of the 5'-UTR.



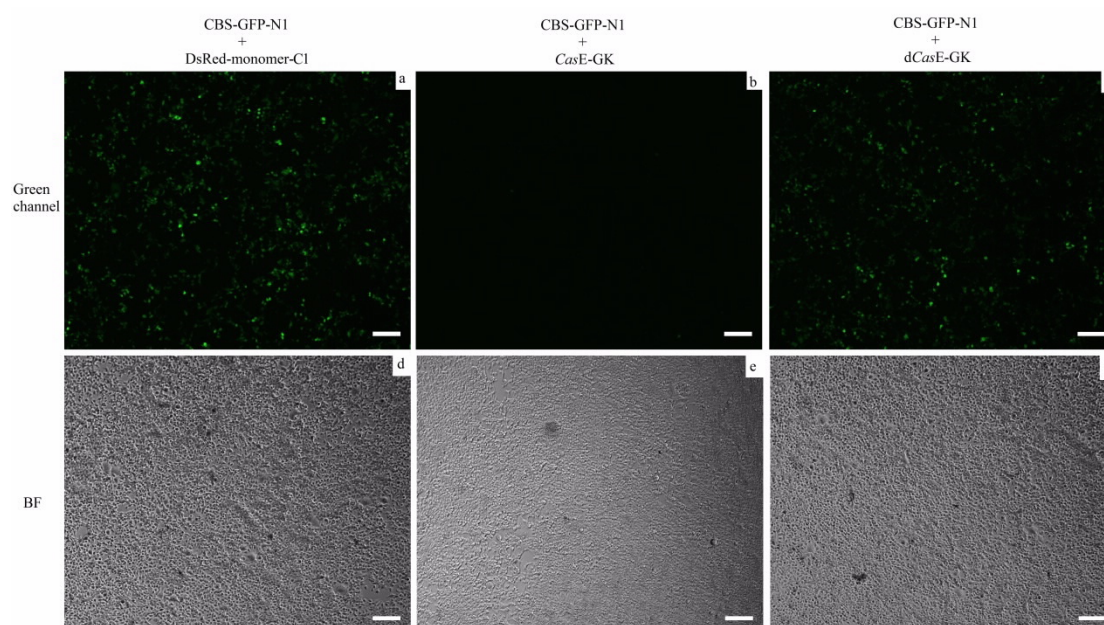

**Figure 1D.**

CBS-GFP expression level is sharply decreased only when *CasE* protein is introduced into the system, but not RFP (negative control) or d*CasE*. Plasmids combinations for each transfection are indicated on top of the pictures. Plasmids dosages (for one well of a 24-well plate) are: 300 ng of CBS-GFP-N1 and 100 ng of DsRed-monomer-C1, *CasE*-GK, or d*CasE*-GK. d f are bright field images of a c. Scale bar, 200  $\mu$ m.



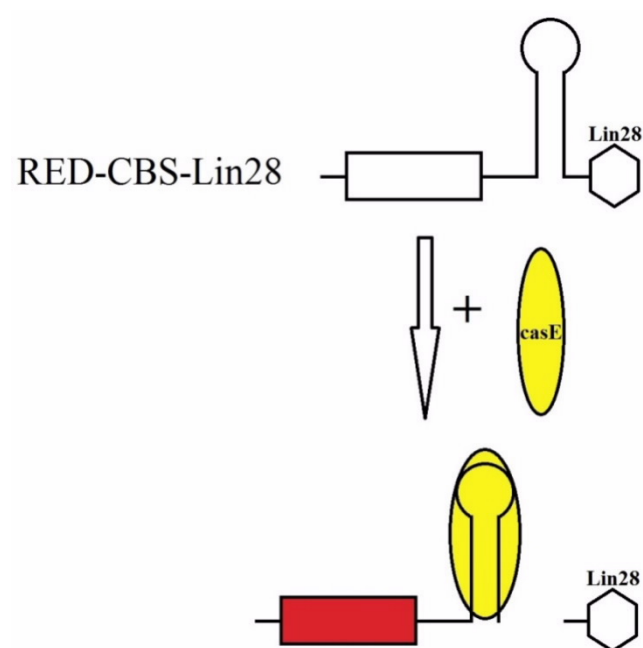

**Figure 1E.** Graphical illustration of the ‘turn-on’ reporter system. Lin28 is cleaved by *CasE*, and the RED-CBS mRNA is then released from cell nucleus to cytoplasm for translation.

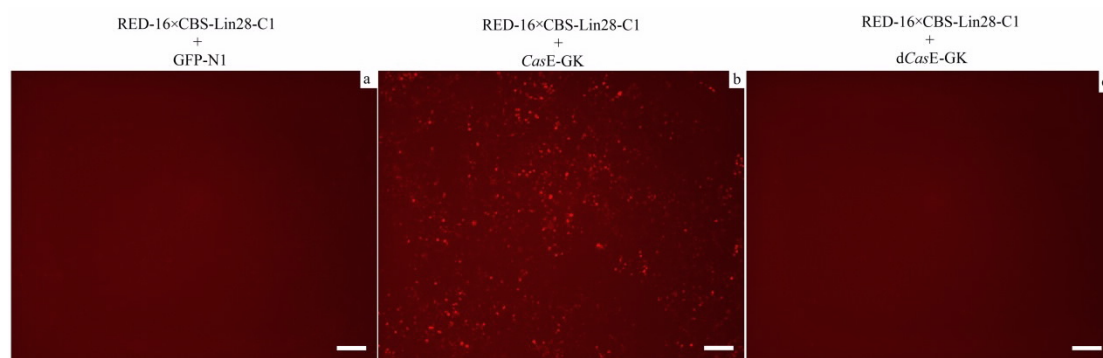

**Figure 1F.** RED-CBS-Lin28 reporter is turned on (red fluorescent) by *CasE* restriction but not EGFP (negative control) or d*CasE* protein. The transfection plasmid dosage (for one well of a 24-well plate) are 100ng of RED-16×CBS-Lin28-C1 and 300ng of GFP-N1, *CasE*-GK or d*CasE*-GK. Scale bar, 200  $\mu$ m.

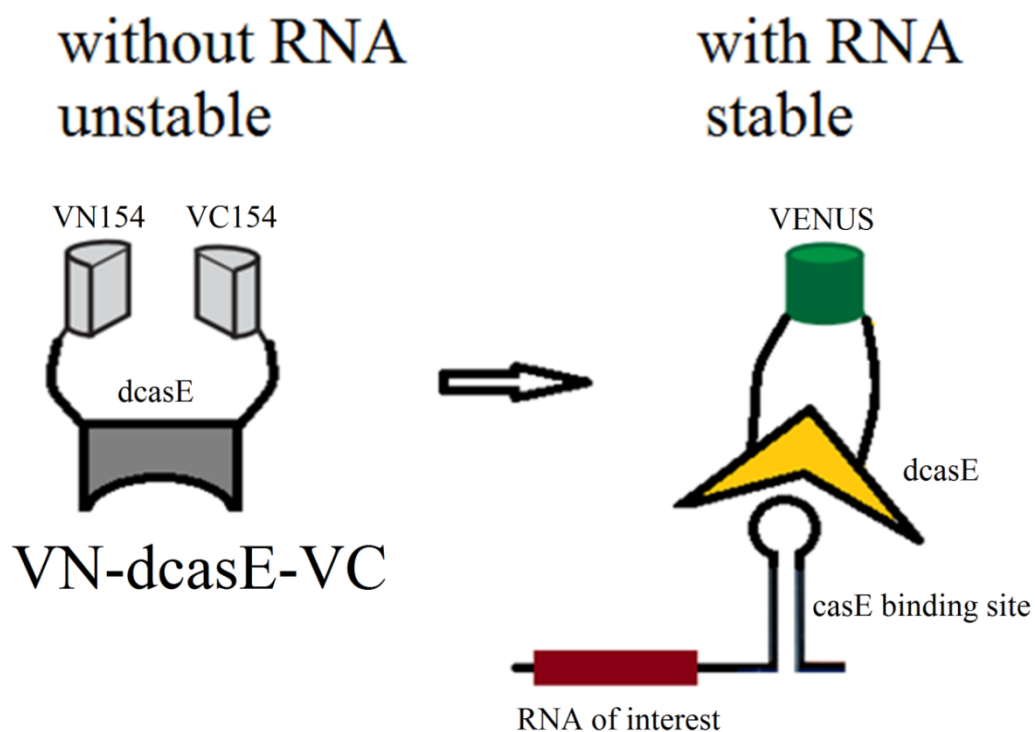

**Figure 2A.** conjectural mechanism for the target induced fluorescent activation of VN-dCasE-VC.

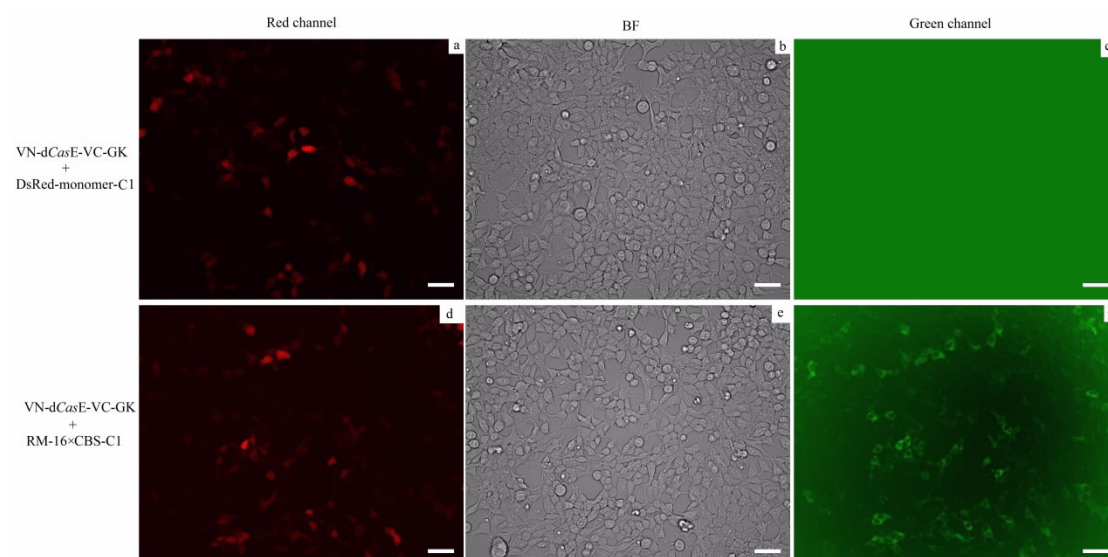

**Figure 2B.** Fluorescent of the VN-dCasE-VC induced by target mRNA in 293T cells.

Plasmid RM-16×CBS-C1 derived from vector DsRed-monomer-C1 contains 16×CBS RNAs at the 3'-UTR region of RED monomer gene. VN-dCasE-VC has no fluorescent signal without CBS (c), and induced signal is detected when CBS (target mRNA) is present (f). The transfection plasmid dosages are 50 ng of VN-dCasE-VC-GK and 800 ng of DsRed-monomer-C1 or RM-16×CBS-C1. Scale bar, 50  $\mu$ m.

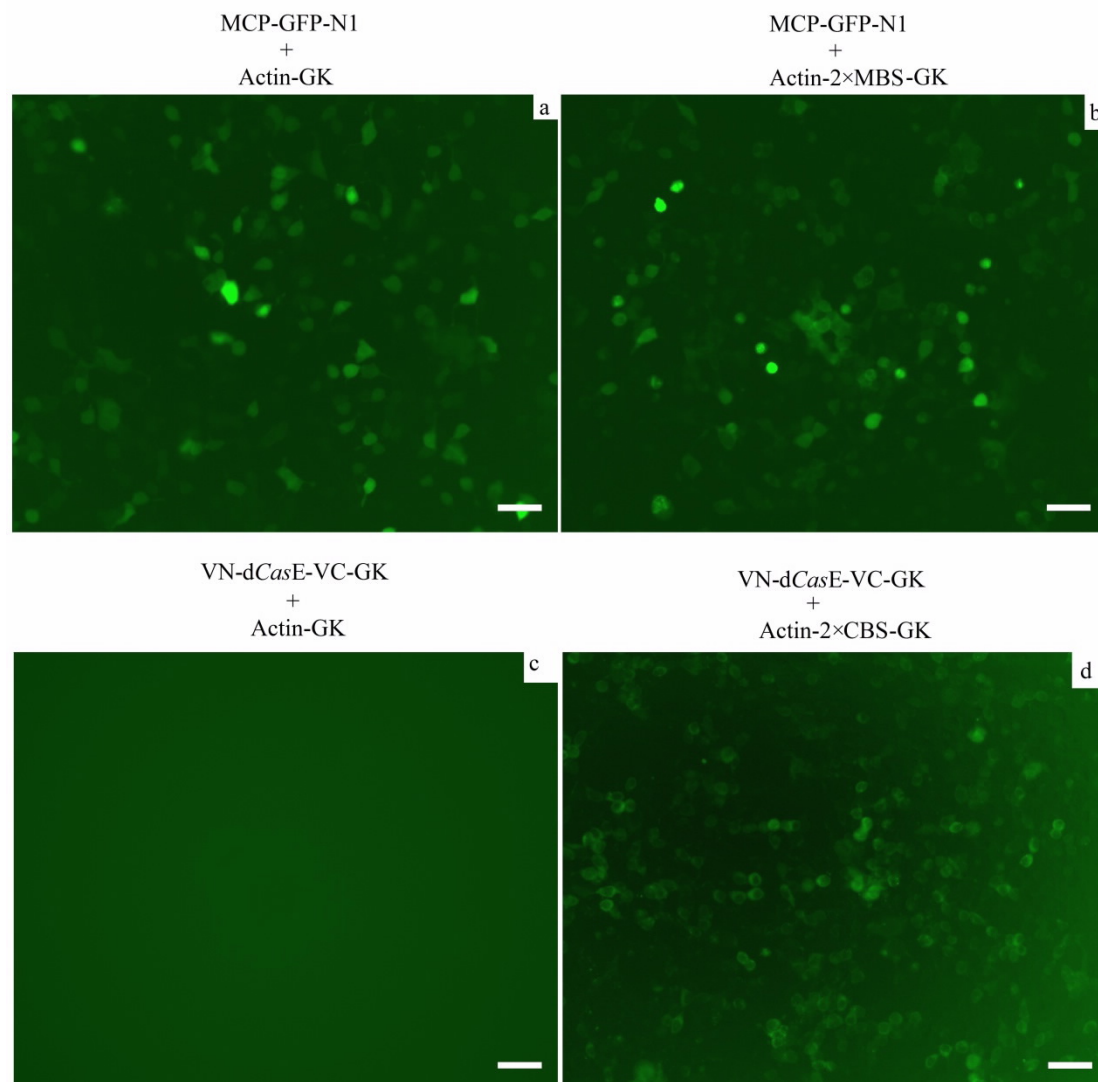

**Figure 2C.**  $\beta$ -Actin mRNA imaging by the VN-dCasE-VC and MS2 systems. Plasmids MCP-GFP-N1 and VN-dCasE-VC-GK are used to overexpress MCP-GFP and VN-dCasE-VC, respectively. Actin-GK, Actin-2xMBS-GK, and Actin-2xCBS-GK are used to transcribe  $\beta$ -actin mRNA without tag, with two MCP Binding Site (MBS) in the 3'-UTR region, and with two CBS RNAs in the 3'-UTR region, respectively. The transfection plasmid dosages are 50 ng of MCP-GFP-N1 or VN-dCasE-VC-GK, and 800 ng of Actin-GK, Actin-2xMBS-GK, or Actin-2xCBS-GK. Scale bar, 50  $\mu$ m.

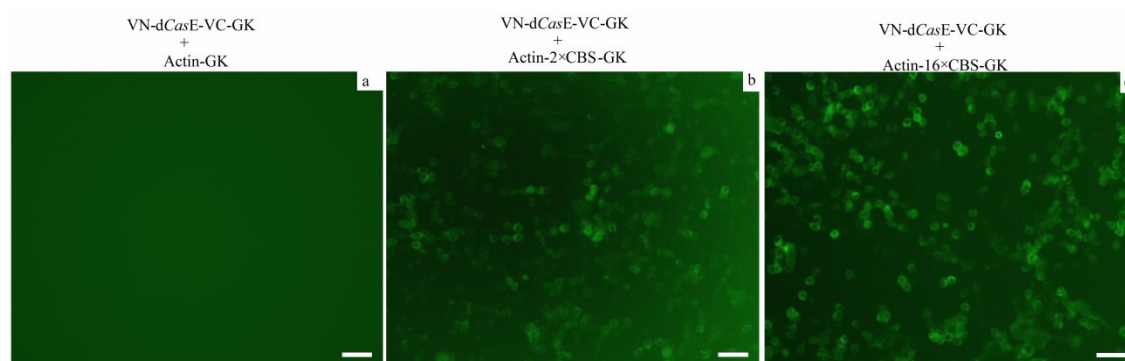

**Figure 2D.** -Actin mRNA imaging with 0, 2 or 16 CBSs. The transfection plasmid dosages are 50 ng of VN-dCasE-VC-GK and 800 ng of Actin-GK or Actin-2(16)×CBS-GK. Scale bar, 50  $\mu$ m.

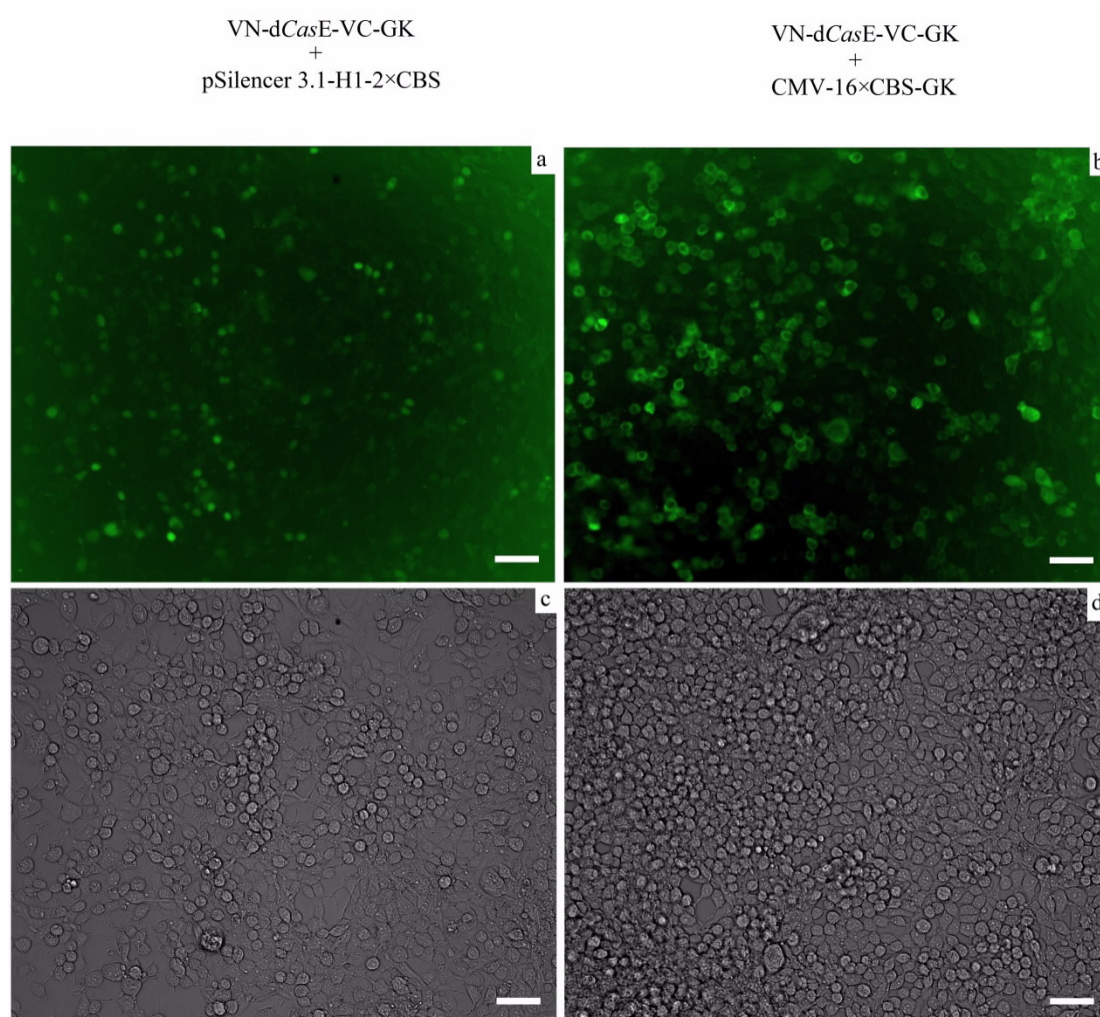

**Figure 2E.** Images of CBS RNAs transcribed from different promoters. Plasmid pSilencer 3.1-H1-2×CBS transcribes 2×CBS RNAs from H1 promoter, while plasmid CMV-16×CBS-GK transcribes 16×CBS RNAs from CMV promoter. c and d are bright fields of a and b, respectively. The transfection plasmid dosages are 50 ng of VN-dCasE-VC-GK and 800 ng of pSilencer 3.1-H1-2×CBS or CMV-16×CBS-GK. Scale bar, 50 μm.
